## **Rapid *in vivo* development of resistance to daptomycin in vancomycin-resistant *Enterococcus faecium* due to genomic rearrangements**

1

2 Sarah Mollerup<sup>1</sup>, Christine Elmeskov<sup>1,2</sup>, Heidi Gumpert<sup>1</sup>, Mette Pinholt<sup>1</sup>, Tobias Steen Sejersen<sup>3</sup>,

3 Martin Schou Pedersen<sup>1</sup>, Peder Worning<sup>1</sup>, Dorte Frees<sup>2</sup> and Henrik Westh<sup>1,4</sup>

4

5 1) Department of Clinical Microbiology, Copenhagen University Hospital – Amager and Hvidovre,

6 Copenhagen, Denmark

7 2) Department of Veterinary Disease Biology, Faculty of Health and Medical Sciences, University

8 of Copenhagen, Frederiksberg Denmark

9 3) Core Facility for Integrated Microscopy, Faculty of Health and Medical Sciences, University of

10 Copenhagen, Copenhagen, Denmark.

11 4) Department of Clinical Medicine, Faculty of Health and Medical Sciences, University of

12 Copenhagen, Copenhagen, Denmark.

13

14 Running Title: Development of daptomycin resistance in VRE

15

16 # Corresponding author:

17 Sarah Mollerup, PhD

18 Department of Clinical Microbiology, Hvidovre Hospital, Kettegård Alle 30, DK2650 Hvidovre

19 Denmark

20 sarah.mollerup@regionh.dk

21 +45 3862 1636

22 **Abstract**

23

24 **Background.** Daptomycin is a cyclic lipopeptide used in the treatment of vancomycin-resistant  
25 *Enterococcus faecium* (VREfm). However, the development of daptomycin-resistant VREfm  
26 challenges the treatment of nosocomial VREfm infections. Resistance mechanisms of daptomycin  
27 are not fully understood. Here we analysed the genomic changes leading to a daptomycin-susceptible  
28 VREfm isolate becoming resistant after 40 days of daptomycin and linezolid combination therapy.

29 **Methods.** The two isogenic VREfm isolates (daptomycin-susceptible and daptomycin-resistant)  
30 were analysed using whole genome sequencing with Illumina and Nanopore.

31 **Results.** Whole genome comparative analysis identified the loss of a 46.5 kb fragment and  
32 duplication of a 29.7 kb fragment in the daptomycin-resistant isolate, with many implicated genes  
33 involved in cell wall synthesis. Two plasmids of the daptomycin-susceptible isolate were also found  
34 integrated in the chromosome of the resistant isolate. One nonsynonymous SNP in the *rpoC* gene  
35 was identified in the daptomycin-resistant isolate.

36 **Conclusions.** Daptomycin resistance developed through chromosomal rearrangements leading to  
37 altered cell wall structure. Such novel types of resistance mechanisms can only be identified by  
38 comparing closed genomes of isogenic isolates.

39

40 **Keywords:** vancomycin-resistant *Enterococcus faecium*, VRE, Daptomycin resistance, mannose  
41 pathway, cell envelope,

42

43

## 44 **Introduction**

45 Enterococci are commonly found in the environment, in the human and animal gut as commensal  
46 bacteria and as hospital-adapted pathogens(1). *Enterococcus faecium* is an important pathogen in  
47 nosocomial infections, where it causes a variety of infections such as urinary tract infections,  
48 intraabdominal infections, catheter related infections and bacteremia(1). Vancomycin is first-line  
49 treatment of *E. faecium* infections, however the emergence of vancomycin-resistant *E. faecium*  
50 (VREfm) has limited the treatment options(2, 3). VRE treatment is often linezolid or daptomycin  
51 sometimes given in combination(4). Daptomycin is a bactericidal cyclic lipopeptide that disrupts  
52 multiple bacterial cell membrane functions(5).

53 Whole genome sequencing (WGS) of *E. faecium* isolates has led to the identification of several  
54 chromosomal loci associated with decreased daptomycin susceptibility (6). Frequently, the identified  
55 genetic changes map into genes that can be divided into two functional categories: (i) genes encoding  
56 regulatory systems responding to cell envelope stress such as the *liaFSR*, and the *yycFG/yycHIJ*  
57 genes encoding homologues of two- or three-component systems that in other bacteria respond to  
58 antibiotics targeting the cell wall, and, (ii) genes encoding enzymes involved in the metabolism of  
59 cell membrane phospholipids such as *cls*, a cardiolipin synthase, *GdpD*, a glycerolphosphoryl diester  
60 phosphodiesterase, and *mprF*, a multi-peptide resistance factor. Other studies have failed to identify  
61 mutations in the abovementioned genes in daptomycin-resistant *E. faecium* strains(7), have identified  
62 other mutations(8), or have also detected presumed resistance mutations prior to daptomycin  
63 treatment (9). The mechanisms of daptomycin resistance thus seems to be diverse.

64 We applied WGS to VREfm isolates from a patient obtained before and after development of  
65 daptomycin resistance. The aim of the study was to investigate the genetic background leading to the  
66 development of daptomycin resistance in VREfm following prolonged daptomycin and linezolid  
67 combination therapy.

68

69

70 **Methods**

71 **Patient history**

72 The patient was admitted to the intensive care unit of Copenhagen University Hospital Hvidovre  
73 (Copenhagen, Denmark) with gallstone induced pancreatitis, which developed into necrotising  
74 pancreatitis with intraabdominal abscesses. The patient was treated with vancomycin and broad-  
75 spectrum antibiotics, and the abscesses were flushed with vancomycin. After thirty days, a VREfm  
76 isolate was identified (minimum inhibitory concentration (MIC) of daptomycin 2 mg/l), and  
77 combination therapy with linezolid and daptomycin was started. Forty days later, the patient had  
78 developed daptomycin-resistant VREfm (MIC 8 mg/l), and treatment was changed to linezolid (MIC  
79 0.5 mg/l) and tigecycline (MIC 0.016 mg/l).

80

81 **Isolates**

82 The daptomycin susceptible VREfm isolate, V1164, was identified in drain fluid from an  
83 intraabdominal abscess, and the first daptomycin-resistant VREfm isolate, V1225, was identified  
84 from the patient's bloodstream. Vancomycin, linezolid, tigecycline, and rifampicin MICs were  
85 established using E-test and applying the EUCAST breakpoints, while an ECOFF value for *E.*  
86 *faecium* of  $\leq 4$   $\mu\text{g/ml}$  was applied for daptomycin(10).

87

88 **Whole genome sequencing**

89 WGS of the two isolates was performed using an Illumina MiSeq using Nextera XT library  
90 preparation kit running 2x150 bp paired-end reads as previously described(11). High molecular  
91 weight DNA was obtained with the GenFind V2 kit (Beckman Coulter, Brea, USA) from 3 ml SB  
92 overnight cultures and Oxford Nanopore sequencing was performed with a SQK-LSK108 1D  
93 ligation kit and native barcoding indices on a R9.4.1 flow cell

94

## 95 **Bioinformatic analysis**

96 Nanopore reads were basecalled using Albacore software and barcodes were trimmed using  
97 porechop with an additional demultiplexing check compared to the Albacore barcode splitting. A  
98 hybrid assembly using Nanopore and Illumina reads was created using Unicycler v. 4.0.7 with  
99 default settings(12). Nanofilt(13) was used to filter nanopore reads. Application of different cut-offs  
100 for quality filtering scores prior to hybrid assembly were tested. For V1225, the final closed  
101 assembly was obtained removing reads with quality score <10. Short, linear contigs were discarded  
102 from the final assemblies.

103 Core-genome and multi-locus sequencing types (cgMLST and MLST, respectively) were assigned  
104 using Ridom SeqSphere+ (Ridom GmbH). Vancomycin-resistance genes were detected using an in-  
105 house script. The genomes were annotated using Prokka(14) v. 1.14.5. The NASP single nucleotide  
106 polymorphism (SNP) pipeline was used to identify SNPs in V1225 using the closed V1164  
107 chromosome as reference. This included masking of duplicate regions using NUCmer(15), mapping  
108 of reads using BWA(16), and SNP calling and identification using GATK(17) with default  
109 thresholds. The effect of identified SNPs were evaluated using web-based BLASTx of of the gene  
110 sequences containing identified mutations.

111 Genomic rearrangements were identified by aligning the two closed genomes using MUMmer(18) v.  
112 4.0.0beta2 setting the minimum length of a match (-l) to 3000, computing forward and reverse  
113 complement matches (-b), and including non-unique matches in the reference sequence (-maxmatch).  
114 The rearrangements were visualized using Ribbon(19).

115 To confirm loss or acquisition of genetic information, Illumina reads were aligned against the closed  
116 genomes using Bowtie 2(20) v. 2.3.4.1 (adding options --no-mixed -X 2000). Duplicate reads were  
117 removed using Picard toolkit v. 2.20.2 MarkDuplicates function(21), depth and breadth of coverage  
118 was assessed using BEDtools v. 2.28.0(22), and genome coverage was plotted in R v. 4.0.0(23).

119 Command-line analysis jobs were executed in parallel using GNU parallel v. 20181222(24).

120 The raw reads are available from the European Nucleotide Archive (V1164 Sample accession  
121 SAMEA5367917, V1225 Sample accession SAMEA5367970) and the two closed genomes are  
122 deposited in GenBank under accession numbers CP083912-CP083929.

123

#### 124 **Transmission electron microscopy**

125 The two isolates V1164 and V1225 were grown overnight at 37°C on brain heart infusion agar  
126 plates. The next day the cultures were diluted 1:10 in 10 ml BHI medium grown at 37°C with  
127 shaking (200 rpm) until OD<sub>600</sub> reached approximately 1.0. When OD<sub>600</sub> was reached, the cultures  
128 were put on ice until imaging. A negative stain procedure single-droplet method was used before  
129 imaging; formvar-carbon coated grids (Pure C, 200 mesh Cu) were glow discharged (30 sec., 5 mA)  
130 before use to increase their hydrophilicity. Then 10 µl of the sample was placed on the grid. After 60  
131 seconds the excess sample was slowly removed from the opposite side using a wedge of filter paper  
132 and 10 µl of staining (2% phosphotungstic acid, pH = 7) was applied. After additionally 60 seconds  
133 excess staining from the opposite side was removed using a wedge of filter paper and a rinse with  
134 distilled water was performed. Subsequently samples were examined with a Philips CM 100  
135 Transmission EM™ (Philips, Eindhoven, The Netherlands), operated at an accelerating voltage of 80  
136 kV. Images were recorded with an OSIS Veleta™ digital slow scan 2,000 × 2,000 CCD camera and  
137 the iTEM™ (Philips) software package.

138

139 **Results**

140 The daptomycin-susceptible isolate V1164 exhibited a daptomycin MIC of 2 mg/l and a rifampicin  
141 MIC of 8 mg/l while the daptomycin-resistant isolate V1225 exhibited a daptomycin MIC of 8 mg/l  
142 and a rifampicin MIC of  $\geq 32$  mg/l.

143  
144 **Genetic events leading to daptomycin resistance in VREfm V1225**

145 WGS of the isolates was performed to investigate their genetic background and to uncover potential  
146 mutations causing daptomycin resistance. Hybrid assembly of Illumina and Nanopore reads resulted  
147 in closed genomes of both the daptomycin-susceptible V1164 and the daptomycin-resistant V1225  
148 (Supplementary table 1). The two VREfm isolates were assigned to cgMLST 864, MLST 18, CC17.  
149 The *vanA* gene was present on a circular plasmid of 52 kb in V1664 and of 48 kb in V1225.  
150 One SNP had developed in the daptomycin-resistant VREfm isolate V1225 compared to the  
151 susceptible V1164. The identified A->G substitution in position 3485 was a missense mutation in  
152 *rpoC* encoding the DNA-directed RNA polymerase subunit beta', resulting in the amino acid change  
153 K1163E (lys->glu).

154 Whole genome comparative analysis (Figure 1) showed that a 46.5 kb region in the closed  
155 chromosome of V1164 (Supplementary file 1) was absent in the V1225 genome. The deleted region  
156 contained 45 genes (Supplementary table 2). Some of the absent genes were transposases, genes  
157 encoding capsular biosynthesis proteins, genes associated with mannose metabolic pathways and  
158 gene encoding a chloride channel protein, but none have previously been linked to daptomycin  
159 resistance. Immediately downstream of the deletion, an insertion of a duplicated 29.7 kb region  
160 (Supplementary file 2) containing 32 genes was identified (Supplementary table 3). These included  
161 genes involved in iron homeostasis. Two plasmids of 21.1 kb and 3.9 kb present in V1164 were  
162 found to be integrated in the chromosome of V1225, these comprised 15 and 5 genes, respectively  
163 (Supplementary table 4 and 5) and included genes involved in translocation of substrates across

164 membranes. ISL3 family transposase genes bordered all the affected genomic regions, suggesting  
165 that these genes may have been involved in the recombination events.

166 To confirm the deletion and duplication events, reads were mapped to the closed genomes. Mapping  
167 of V1225 reads to the V1164 chromosome showed missing coverage at the chromosomal deletion  
168 and a depth of coverage of twice the average depth at the chromosomal region being duplicated in  
169 V1225 (Supplementary Figure 1). Mapping of V1664 reads to the V1225 chromosome showed a  
170 depth of coverage of half the average depth at the duplicated region (and the original location),  
171 confirming these genomic rearrangements. Integration of the two plasmids in V1225 could not be  
172 confirmed by mapping, due to ISL3 family transposases being present both in the plasmids and at the  
173 integration sites, hence the sequence representing the transition from plasmid to chromosome was  
174 already present and no gap in coverage could be observed. V1164 was Illumina-sequenced twice,  
175 and hybrid assembly using the second set of read pairs also assembled the 21.1 kb plasmid, in this  
176 case with higher depth of coverage than obtained for the first hybrid assembly, indicating that the  
177 sequence does represent a plasmid (Supplementary table 6). Application of different levels of quality  
178 filtering of the nanopore reads also resulted in “integration” of this plasmid into the chromosome,  
179 indicating that a mixed population could exist for V1164 with some bacterial cells having the  
180 plasmid integrated and some not.

181

## 182 **Electron microscopy of the daptomycin-susceptible and daptomycin-resistant isolate**

183 Previous studies demonstrated that the development of daptomycin resistance in *E. faecalis* is  
184 associated with profound ultrastructural changes in the cell envelope(25). This prompted us to  
185 perform electron microscopy of both the susceptible and resistant isolates to investigate any  
186 morphological changes between the two strains. Transmission electron microscopy (TEM) revealed  
187 notable differences in the cell morphology of the two isolates (Figure 2). The daptomycin-resistant  
188 VREfm V1225 cells appeared larger than the susceptible V1164 strain, and while the V1164 strain



189 grew in chains, V1225 cells tended to clump and form aggregates. Moreover, characteristic abrasions  
190 were visible in the cell envelope of V1225 cells possibly leading to budding (see arrows in Figure 2).

191

## 192 **Discussion**

193 Daptomycin resistance in enterococci is still a rare phenomenon, but it is of great concern for the  
194 individual patient(6). Daptomycin is mainly excreted by the kidney, but a low amount is also  
195 excreted in the faeces. As VREfm colonization is localized to the gut, the low gut concentration of  
196 daptomycin might contribute to the development of resistance in VREfm(26).

197 The 46 kb loss of chromosomal genes could be the cause of daptomycin resistance, possibly in  
198 combination with the 29 kb duplication. However, the duplication and insertions could also be part  
199 of compensatory genomic mechanisms to reduce the impact of the deleted genes. Interestingly the  
200 loss involved genes annotated as involved in the mannose metabolic pathway presumably decreasing  
201 glycolisation of cell wall structural proteins, and genes of the capsular polysaccharide biosynthesis  
202 pathway(27). The loss of these genes may be the cause of the altered cell and cell wall structure seen  
203 by TEM. The large deletion found is reminiscent of a finding where a *Pseudomonas aeruginosa*  
204 isolate lost 8% of its genome following repeated antimicrobial courses over years of treatment in a  
205 patient with cystic fibrosis(28). The duplication of genes involved in iron homeostasis could be a  
206 compensatory mechanism in response to the host iron withholding defense system limiting the  
207 availability of free iron(29).

208 Several genetic mutations, predominantly SNPs and often in combination, have been associated with  
209 daptomycin resistance in VREfm(6), but no specific mutation has been pinpointed as the leading  
210 cause of resistance. We identified one SNP in the *rpoC* gene of the daptomycin-resistant VREfm  
211 isolate V1225. Mutations in *rpoB* and *rpoC* have previously been identified in *Staphylococcus*  
212 *aureus* strains exhibiting increased MICs for daptomycin(30, 31) and rifampicin(31), and the here

213 identified mutation could therefore contribute to the decreased susceptibility to both daptomycin and  
214 rifampicin observed.

215 The daptomycin-resistant VREfm V1225 isolate exhibited a number of morphological changes such  
216 as increased cell size, cell clumping, and characteristic distortions in the cell envelope. Interestingly,  
217 similar morphological changes were previously observed in daptomycin-resistant enterococci that  
218 have become resistant through mutations in other genes (*gdpP*, *liaF*, and *cls*)(25). Release of  
219 membrane phospholipids that inactivate daptomycin has been reported for Staphylococci,  
220 Streptococci, and *E. faecalis*, thus representing another mechanism leading to daptomycin treatment  
221 failure. Our isolates ability to rapidly mutate over weeks reflects the adaptability of the enterococcal  
222 genome when challenged by continuous antimicrobial treatment. Interestingly, concomitant  
223 treatment with linezolid did not prevent development of daptomycin resistance. In conclusion, our  
224 daptomycin-resistant VREfm had a large chromosomal deletion, a duplication and two plasmid  
225 insertions leading to an altered cell structure. These genetic events would have been unrecognized by  
226 antimicrobial resistance detection software and were only identified because closed genomes of the  
227 daptomycin-resistant isolate and its isogenic ancestor were compared.

228

## 229 **Acknowledgements**

230 We would like to express our gratitude to The Core Facility for Integrated Microscopy  
231 (<http://cfim.ku.dk>) for support with electron microscopy. Computerome 2.0 was used for  
232 computational analysis.

233

## 234 **Transparency declarations**

235 None to declare

236 **References**

237

- 238 1. Arias CA, Murray BE. 2012. The rise of the Enterococcus: Beyond vancomycin resistance.  
239 Nat Rev Microbiol. Nat Rev Microbiol.
- 240 2. ECDC. 2019. Antimicrobial resistance in the EU/EEA (EARS-Net) Annual Epidemiological  
241 Report for 2019.
- 242 3. DANMAP. 2019. DANMAP 2019 - Use of antimicrobial agents and occurrence of  
243 antimicrobial resistance in bacteria from food animals, food and humans in Denmark.
- 244 4. Zhou X, Willems RJL, Friedrich AW, Rossen JWA, Bathoorn E. 2020. Enterococcus faecium:  
245 from microbiological insights to practical recommendations for infection control and  
246 diagnostics. Antimicrob Resist Infect Control 9.
- 247 5. Humphries RM, Pollett S, Sakoulas G. 2013. A current perspective on daptomycin for the  
248 clinical microbiologist. Clin Microbiol Rev. Clin Microbiol Rev.
- 249 6. Bender JK, Cattoir V, Hegstad K, Sadowy E, Coque TM, Westh H, Hammerum AM, Schaffer  
250 K, Burns K, Murchan S, Novais C, Freitas AR, Peixe L, Del Grosso M, Pantosti A, Werner G.  
251 2018. Update on prevalence and mechanisms of resistance to linezolid, tigecycline and  
252 daptomycin in enterococci in Europe: Towards a common nomenclature. Drug Resist Updat  
253 40:25–39.
- 254 7. Tyson GH, Sabo JL, Rice-Trujillo C, Hernandez J, McDermott PF. 2018. Whole-genome  
255 sequencing based characterization of antimicrobial resistance in Enterococcus. Pathog Dis  
256 76:18.
- 257 8. Chacko KI, Sullivan MJ, Beckford C, Altman DR, Ciferri B, Pak TR, Sebra R, Kasarskis A,  
258 Hamula CL, Van Bakel H. 2018. Genetic basis of emerging vancomycin, linezolid, and  
259 daptomycin heteroresistance in a case of persistent Enterococcus faecium bacteremia.  
260 Antimicrob Agents Chemother 62.

- 261 9. Udaondo Z, Jenjaroenpun P, Wongsurawat T, Meyers E, Anderson C, Lopez J, Mohan M,  
262 Tytarenko R, Walker B, Ussery D, Kothari A, Jun S-R. 2020. Two Cases of Vancomycin-  
263 Resistant *Enterococcus faecium* Bacteremia With Development of Daptomycin-Resistant  
264 Phenotype and its Detection Using Oxford Nanopore Sequencing. *Open Forum Infect Dis* 7.
- 265 10. Tran TT, Munita JM, Arias CA. 2015. Mechanisms of drug resistance: daptomycin resistance.  
266 *Ann N Y Acad Sci* 1354:n/a-n/a.
- 267 11. Pinholt M, Lerner-Svensson H, Littauer P, Moser CE, Pedersen M, Lemming LE, Ejlertsen T,  
268 Søndergaard TS, Holzkecht BJ, Justesen US, Dzajic E, Olsen SS, Nielsen JB, Worning P,  
269 Hammerum AM, Westh H, Jakobsen L. 2015. Multiple hospital outbreaks of vanA  
270 *Enterococcus faecium* in Denmark, 2012–13, investigated by WGS, MLST and PFGE. *J*  
271 *Antimicrob Chemother* 70:2474–2482.
- 272 12. Wick RR, Judd LM, Gorrie CL, Holt KE. 2017. Unicycler: Resolving bacterial genome  
273 assemblies from short and long sequencing reads. *PLoS Comput Biol* 13:1–22.
- 274 13. De Coster W, D’Hert S, Schultz DT, Cruts M, Van Broeckhoven C. 2018. NanoPack:  
275 Visualizing and processing long-read sequencing data. *Bioinformatics* 34:2666–2669.
- 276 14. Seemann T. 2014. Prokka: Rapid prokaryotic genome annotation. *Bioinformatics* 30:2068–  
277 2069.
- 278 15. Kurtz S, Phillippy A, Delcher AL, Smoot M, Shumway M, Antonescu C, Salzberg SL. 2004.  
279 Versatile and open software for comparing large genomes. *Genome Biol* 5.
- 280 16. Li H, Durbin R. 2009. Fast and accurate short read alignment with Burrows-Wheeler  
281 transform. *Bioinformatics* 25:1754–1760.
- 282 17. McKenna A, Hanna M, Banks E, Sivachenko A, Cibulskis K, Kernytzky A, Garimella K,  
283 Altshuler D, Gabriel S, Daly M, DePristo MA. 2010. The genome analysis toolkit: A  
284 MapReduce framework for analyzing next-generation DNA sequencing data. *Genome Res*  
285 20:1297–1303.

- 286 18. Marçais G, Delcher AL, Phillippy AM, Coston R, Salzberg SL, Zimin A. 2018. MUMmer4: A  
287 fast and versatile genome alignment system. *PLoS Comput Biol* 14:1–14.
- 288 19. Nattestad M, Aboukhalil R, Chin C-S, Schatz MC. 2020. Ribbon: intuitive visualization for  
289 complex genomic variation. *Bioinformatics* 37:413–415.
- 290 20. Langmead B, Salzberg SL. 2012. Fast gapped-read alignment with Bowtie 2. *Nat Methods*  
291 9:357–359.
- 292 21. 2019. Picard Toolkit. Broad Institute.
- 293 22. Quinlan AR, Hall IM. 2010. BEDTools: A flexible suite of utilities for comparing genomic  
294 features. *Bioinformatics* 26:841–842.
- 295 23. 2021. R Core Team. R: A language and environment for statistical computing. R Foundation  
296 for Statistical Computing, Vienna, Austria.
- 297 24. Tange O. 2011. GNU Parallel - The Command-Line Power Tool. *login USENIX Mag* 36:42–  
298 47.
- 299 25. Arias CA, Panesso D, McGrath DM, Qin X, Mojica MF, Miller C, Diaz L, Tran TT, Rincon S,  
300 Barbu EM, Reyes J, Roh JH, Lobos E, Sodergren E, Pasqualini R, Arap W, Quinn JP, Shamoo  
301 Y, Murray BE, Weinstock GM. 2011. Genetic Basis for In Vivo Daptomycin Resistance in  
302 Enterococci. *N Engl J Med* 365:892–900.
- 303 26. Lellek H, Franke GC, Ruckert C, Wolters M, Wolschke C, Christner M, Büttner H, Alawi M,  
304 Kröger N, Rohde H. 2015. Emergence of daptomycin non-susceptibility in colonizing  
305 vancomycin-resistant *Enterococcus faecium* isolates during daptomycin therapy. *Int J Med*  
306 *Microbiol* 305:902–909.
- 307 27. Hendrickx AP, Schaik W van, Willems RJ. 2013. The cell wall architecture of *Enterococcus*  
308 *faecium*: from resistance to pathogenesis. <http://dx.doi.org/10.2217/fmb1366> 8:993–1010.
- 309 28. Rau MH, Marvig RL, Ehrlich GD, Molin S, Jelsbak L. 2012. Deletion and acquisition of  
310 genomic content during early stage adaptation of *Pseudomonas aeruginosa* to a human host

- 311 environment. *Environ Microbiol* 14:2200–2211.
- 312 29. Weinberg ED. 1984. Iron Withholding: A Defense Against Infection and Neoplasia. *Physiol*  
313 *Rev* 64.
- 314 30. Friedman L, Alder JD, Silverman JA. 2006. Genetic Changes That Correlate with Reduced  
315 Susceptibility to Daptomycin in *Staphylococcus aureus*. *Antimicrob Agents Chemother*  
316 50:2137.
- 317 31. Bæk KT, Thøgersen L, Mogenssen RG, Mellergaard M, Thomsen LE, Petersen A, Skov S,  
318 Cameron DR, Peleg AY, Frees D. 2015. Stepwise decrease in daptomycin susceptibility in  
319 clinical *staphylococcus aureus* isolates associated with an initial mutation in *rpoB* and a  
320 Compensatory Inactivation of the *clpX* Gene. *Antimicrob Agents Chemother* 59:6983–6991.
- 321
- 322

323 **Figures**

324

325

326

327

328

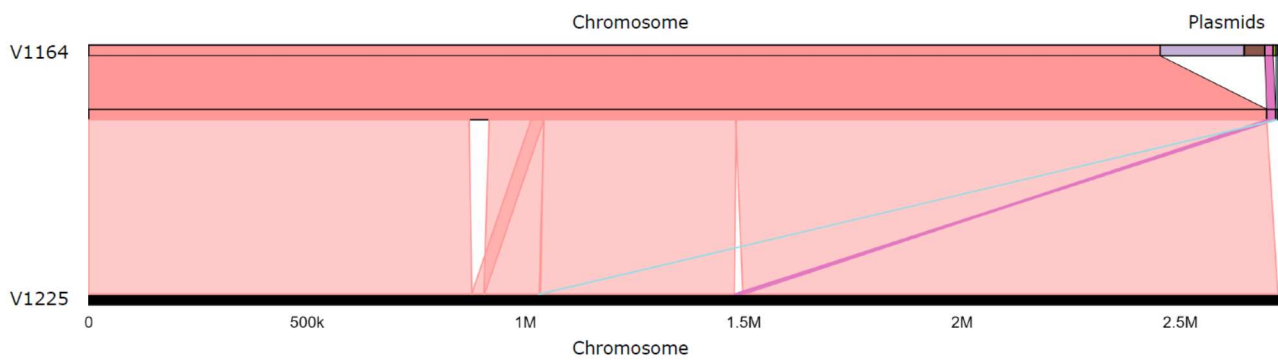

329

330

331 **Figure 1. Genome rearrangements in the daptomycin-resistant VRE isolate.**

332 Visualization of alignment of the daptomycin-susceptible (V1164) and the daptomycin-resistant

333 (V1225) VRE isolates. The top part represents the V1164 genome (chromosome and plasmids), and

334 the bottom part represents the V1225 chromosome. The cyan and magenta lines indicate insertion of

335 two V1164 plasmids in the V1225 chromosome.

336

337

338

339

340

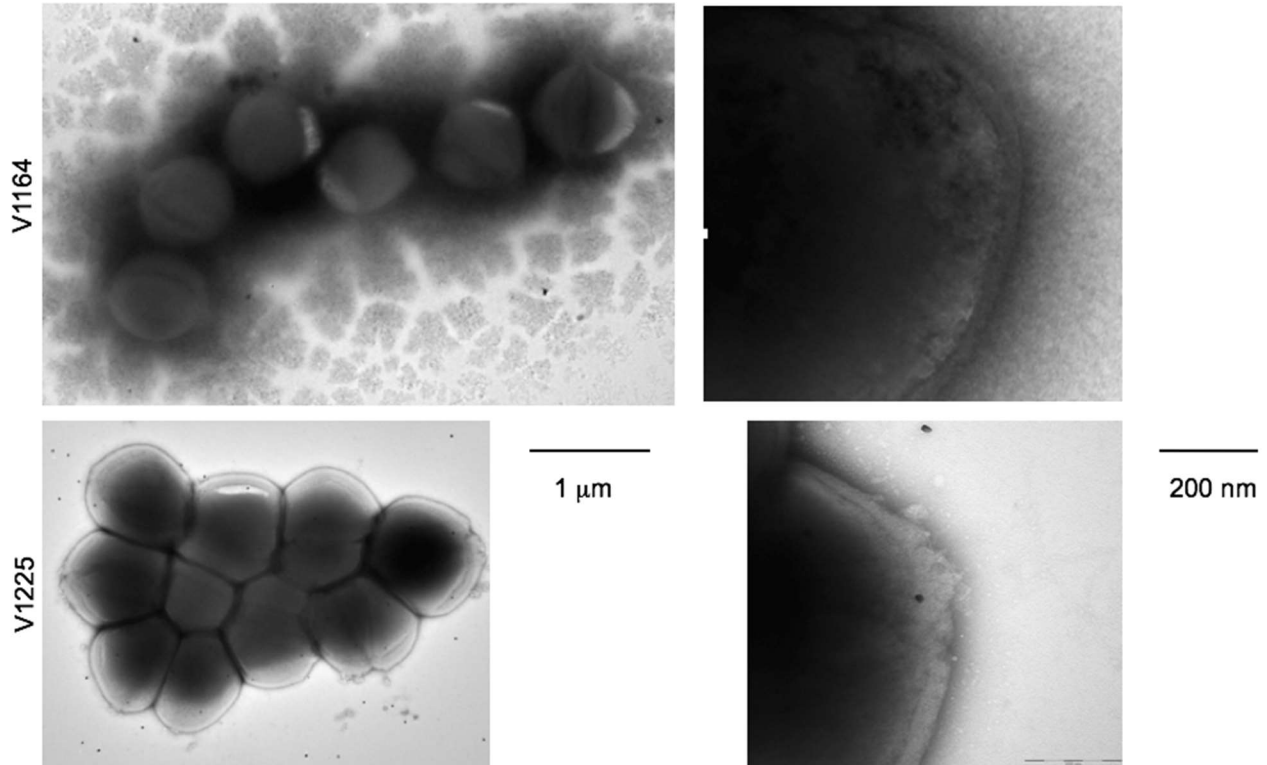

341

342

343 **Figure 2. Electron microscopy of the two VRE isolates.**

344 Negative stain electron microscopy of daptomycin-susceptible V1164 (top) and daptomycin-resistant  
345 VRE V1225 (bottom). Arrows point to abrasions in the cell wall with white vacuoles released from  
346 the abrasion.

347

348



349 **Supplementary figures**

350

351

352

353

354

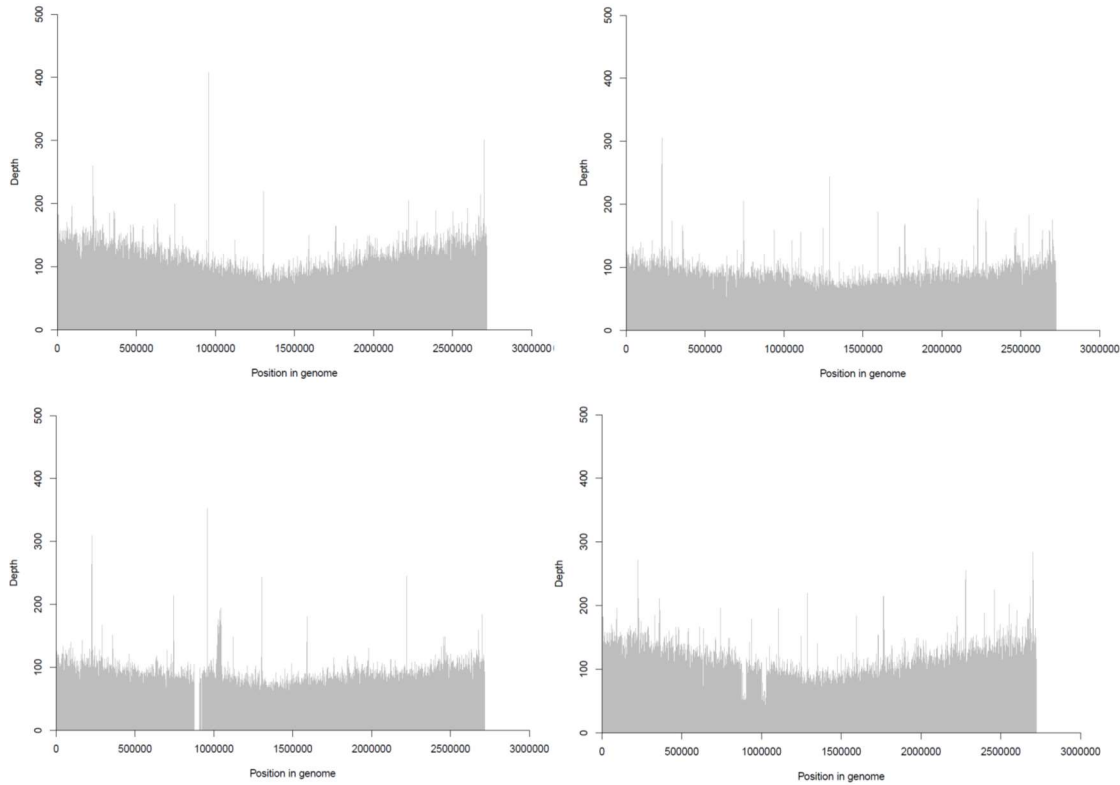

355

356

357 **Supplementary figure 1. Genome coverage of the two VRE isolates.**

358 Top left: V1164 reads mapped to V1164 chromosome; top right: V1225 reads mapped to V1225

359 chromosome; bottom left: V1225 reads mapped to V1164 chromosome; bottom right: V1164 reads

360 mapped to V1225 chromosome.

361

362

363

364
